# Supplementary material
Source: PubMed Central journal article supplement (PMC6086732)
Supplement: NIHMS976434-supplement.pdf [file NIHMS976434-supplement.pdf]

**Table S1. Lifespan analyses. Related to Figure 4.**

| Figure 4            | Strains                       | Median lifespan (Days) | Total Animals | Censored Animals | P-value      |
|---------------------|-------------------------------|------------------------|---------------|------------------|--------------|
| <b>with FUDR</b>    | wild type; N2                 | 19                     | 118           | 23               |              |
|                     | <i>rgef-1p::egl-20</i> line 1 | 24                     | 120           | 13               | *** < 0.0001 |
|                     | <i>rgef-1p::egl-20</i> line 2 | 24                     | 125           | 27               | *** < 0.0001 |
|                     | <i>gly-19p::egl-20</i> line 1 | 24                     | 80            | 6                | *** < 0.0001 |
|                     | <i>gly-19p::egl-20</i> line 2 | 21                     | 142           | 35               | ** < 0.0015  |
| <b>without FUDR</b> | wild type; N2                 | 13                     | 180           | 96               |              |
|                     | <i>rgef-1p::egl-20</i> line 1 | 17                     | 180           | 152              | *** < 0.0001 |
|                     | <i>rgef-1p::egl-20</i> line 2 | 15                     | 180           | 146              | 0.1497(ns)   |
|                     | <i>gly-19p::egl-20</i> line 1 | 17                     | 180           | 133              | *** < 0.0001 |
|                     | <i>gly-19p::egl-20</i> line 2 | 17                     | 180           | 99               | *** < 0.0001 |

**Table S2. Primer sequences used in this study. Related to STAR Methods section.**

| Primer name                     | Sequence(5'-3')        | Source     |
|---------------------------------|------------------------|------------|
| <b>Genotyping primers</b>       |                        |            |
| <b>vps-35 genotyping primer</b> |                        |            |
| ok1880-F                        | GAATGCAGCATCAGGGACC    | This Study |
| ok1880-R                        | AACTGCGAGTGAAACCAGC    | This Study |
| <b>vps-26 genotyping primer</b> |                        |            |
| tm1523-F                        | GCGTGAACGACCAAATCGAG   | This Study |
| tm1523-R                        | CATGGACCTTGGGATGAAGC   | This Study |
| <b>vps-29 genotyping primer</b> |                        |            |
| tm1320-F                        | AGGTGACTCTTACCGCAGGATC | This Study |
| tm1320-R                        | TGGTGCTCCTAATCGGCGAC   | This Study |
| <b>mig-14 genotyping primer</b> |                        |            |
| ga62-F                          | TGAATGGATCTCCTTGACCTAC | This Study |
| ga62-R                          | ATTGACAGCTTGCCGAGTTTGG | This Study |
| <b>dpy-23 genotyping primer</b> |                        |            |
| e840-F                          | GCTCCTGTCCCAGTGGTAAG   | This Study |
| e840-R                          | CATTCTCGCCTGCCTTGATC   | This Study |
| <b>glr-1 genotyping primer</b>  |                        |            |

|                                 |                         |  |            |
|---------------------------------|-------------------------|--|------------|
| n2461-F                         | AGGCAAGAATGCAGCTACC     |  | This Study |
| n2461-R                         | TGCTAACTTGGCTGCGTTCC    |  | This Study |
| <b>ced-1 genotyping primer</b>  |                         |  |            |
| e1735-F                         | GTTCCGAGCACACATCAGAG    |  | This Study |
| e1735-R                         | GGCCAATGTCAATGCGAATC    |  | This Study |
| <b>drp-1 genotyping primer</b>  |                         |  |            |
| tm1108-F                        | TTCCCGGCATCACAAAGATC    |  | This Study |
| tm1108-R                        | TCCTGTGCGGTTTCTAATCG    |  | This Study |
| <b>egl-20 genotyping primer</b> |                         |  |            |
| n585-F                          | GCAATTCATAGGTAGACTGGGTG |  | This Study |
| n585-R                          | CCATCTGCCACATACAGTACG   |  | This Study |
| <b>cwn-1 genotyping primer</b>  |                         |  |            |
| ok546-F                         | GCATTCCATCGGCAGACAG     |  | This Study |
| ok546-R                         | CATGGTTAGCACTCGGGCTTG   |  | This Study |
| <b>cwn-2 genotyping primer</b>  |                         |  |            |
| ok895-F                         | TGAAGCCTGTATGCGAATTACC  |  | This Study |
| ok895-R                         | TTTGAGGAACGCAGGAAATG    |  | This Study |
| <b>lin-44 genotyping primer</b> |                         |  |            |
| n1792-F                         | TTTCTAGGGTTGCCATCAG     |  | This Study |
| n1792-R                         | AATCGTCAATCCATCCTTGTGC  |  | This Study |
| <b>mig-1 genotyping primer</b>  |                         |  |            |
| e1787-F                         | CAGGATGAGCATGATCACGC    |  | This Study |
| e1787-R                         | TCATCTAGTTTCCGGTAGATCAC |  | This Study |
| <b>tph-1 genotyping primer</b>  |                         |  |            |
| mg280-F                         | CATTTATTCTCCCACGGAAACC  |  | This Study |
| mg280-R                         | GATGGCGAACGTATTGAGTG    |  | This Study |
| <b>lin-17 genotyping primer</b> |                         |  |            |
| sy277-F                         | ATCAGCCAAGTAGAGAGCAC    |  | This Study |
| sy277-R                         | CTATGCAAATCACCCGATTCAG  |  | This Study |
| <b>sma-6 genotyping primer</b>  |                         |  |            |
| wk7-F                           | GACTTAGCGTTGAGCATTCC    |  | This Study |
| wk7-R                           | AAGCTCCACTTCCTCTTCC     |  | This Study |
| <b>ser-7 genotyping primer</b>  |                         |  |            |
| tm1325-F                        | ATTTGCTGGCTCCCATTCTTC   |  | This Study |
| tm1325-R                        | GTGTATGGTGCGTTCTGCTG    |  | This Study |
| <b>ser-1 genotyping primer</b>  |                         |  |            |
| ok345-F                         | GTCGCCGTAGCTCTCTTCAG    |  | This Study |
| ok345-R                         | TCAGGTCCCTTTCAACCGAG    |  | This Study |
| <b>ser-4 genotyping primer</b>  |                         |  |            |
| ok512-F                         | GGAGCCTAAACATGATGGGTG   |  | This Study |
| ok512-R                         | GGTCCTAGTGTGCCGAATTG    |  | This Study |
| <b>mod-1 genotyping primer</b>  |                         |  |            |
| ok103-F                         | CCACCCTCTAAAGTCCTTCC    |  | This Study |

|           |                                   |  |                      |
|-----------|-----------------------------------|--|----------------------|
| ok103-R   | CGAGTCATGCCACAGTTGAG              |  | This Study           |
|           |                                   |  |                      |
|           |                                   |  |                      |
|           | <b>qPCR primer</b>                |  |                      |
| act-1-qF  | CCAGGAATTGCTGATCGTATGCAGA<br>A    |  | Chun et al.,<br>2015 |
| act-1-qR  | TGGAGAGGGAAGCGAGGATAGA            |  | Chun et al.,<br>2015 |
| egl-20-qF | GGGAACGTCTGGTCGTGAATG             |  | This Study           |
| egl-20-qR | CATTTCACTTCACAACACCAAACG          |  | This Study           |
| mab-5-qF  | AACGCACTCGTCAGACAT                |  | This Study           |
| mab-5-qR  | TTCATTGCTTCCACCTTC                |  | This Study           |
| lin-39-qF | AATGACAGCGTCTGCTGCAC              |  | This Study           |
| lin-39-qR | CTCCTTCCAGGTGCTTCCAG              |  | This Study           |
| cki-1-qF  | GCCAGGAAGAAAGCCAGAAATG            |  | This Study           |
| cki-1-qR  | AGCATGTGGTTCTGACAGTGAG            |  | This Study           |
| bus-8-qF  | TGTGATAGTGGAGGCCCAGC              |  | This Study           |
| bus-8-qR  | ATCCCTCATCTGTGTCCAGTTC            |  | This Study           |
| mlt-11-qF | TTCAGCCAGTCGTTAAGGGATC            |  | This Study           |
| mlt-11-qR | TGGCGACCTTACCGTTCTTG              |  | This Study           |
| col-38-qF | CCCTTGTCGCCATGCATTCC              |  | This Study           |
| col-38-qR | ACGATTCCATGCATCATCAGACATC         |  | This Study           |
| col-71-qF | TACGATGTGCATCCGAGCAAGC            |  | This Study           |
| col-71-qR | CGTTCCTTCGGAGTCAGAGC              |  | This Study           |
| hsp-6-qF  | CAAACCTCCTGTGTCAGTATCATGGA<br>AGG |  | Tian et al.,<br>2016 |
| hsp-6-qR  | GCTGGCTTTGACAATCTTGTATGGA<br>ACG  |  | Tian et al.,<br>2016 |
